# Supplementary material for: A Co-culture Model of PBMC and Stem Cell Derived Human Nasal Epithelium Reveals Rapid Activation of NK and Innate T Cells Upon Influenza A Virus Infection of the Nasal Epithelium
Source: PubMed Central journal article supplement (PMC6237251; doi:10.3389/fimmu.2018.02514), 2018-11-08
Supplement: Table_1.pdf [file Table_1.pdf]

| Donor   | Treatment | Time | CD8 Freq of CD3 | MAIT Freq of CD3 | CD4 Freq of CD3 | Vd1 Freq of CD3 | Vd2 Freq of CD3 | Nk Freq of Lymh | mono Freq of LIVE |
|---------|-----------|------|-----------------|------------------|-----------------|-----------------|-----------------|-----------------|-------------------|
| Donor 1 | PBMC      | 24 h | 19,7            | 3,15             | 62              | 0,547           | 22,4            | 9,43            | 19,4              |
| Donor 1 | Mock      | 24 h | 19,5            | 3,11             | 61,8            | 0,534           | 21,8            | 10,3            | 21,4              |
| Donor 1 | IAV       | 24 h | 20,1            | 2,8              | 62,8            | 0,498           | 21,5            | 9,91            | 24,4              |
| Donor 2 | PBMC      | 24 h | 29,3            | 1,48             | 64,3            | 0,704           | 4,5             | 4,45            | 9,38              |
| Donor 2 | Mock      | 24 h | 29,8            | 1,58             | 63,7            | 0,686           | 4,59            | 4,41            | 8,66              |
| Donor 2 | IAV       | 24 h | 29,3            | 1,45             | 64,6            | 0,734           | 4,37            | 5,13            | 10,3              |
| Donor 3 | PBMC      | 24 h | 22,1            | 7,57             | 60,1            | 1,3             | 18,7            | 8,99            | 12,8              |
| Donor 3 | Mock      | 24 h | 23,4            | 10,6             | 56,9            | 1,07            | 8,26            | 8,93            | 15,9              |
| Donor 3 | IAV       | 24 h | 22,8            | 8,02             | 58,8            | 1,11            | 10,7            | 8,99            | 16,6              |
| Donor 4 | PBMC      | 24 h | 28,6            | 8,78             | 52,9            | 0,855           | 8,66            | 10,2            | 13,6              |
| Donor 4 | Mock      | 24 h | 29,6            | 9,65             | 51,7            | 0,835           | 7,76            | 13              | 15,5              |
| Donor 4 | IAV       | 24 h | 29,5            | 8,94             | 52,3            | 0,829           | 6,42            | 14,4            | 17,7              |
| Donor 1 | PBMC      | 48 h | 17,8            | 2,84             | 64,4            | 0,581           | 22,3            | 11,6            | 2,74              |
| Donor 1 | Mock      | 48 h | 18              | 2,8              | 64,2            | 0,519           | 23,2            | 11,2            | 7,65              |
| Donor 1 | IAV       | 48 h | 17,9            | 2,51             | 65,7            | 0,371           | 22,9            | 10,7            | 17,7              |
| Donor 2 | PBMC      | 48 h | 28,4            | 1,42             | 65,4            | 0,628           | 4,46            | 4,66            | 1,75              |
| Donor 2 | Mock      | 48 h | 29,3            | 1,55             | 64,1            | 0,596           | 4,69            | 4,61            | 3,76              |
| Donor 2 | IAV       | 48 h | 26,3            | 0,857            | 68,1            | 0,851           | 2,93            | 3,04            | 1,56              |
| Donor 3 | PBMC      | 48 h | 22,1            | 9,68             | 59,3            | 0,996           | 7,29            | 8,75            | 4,02              |
| Donor 3 | Mock      | 48 h | 23,6            | 10,5             | 56,6            | 0,907           | 7,86            | 8,35            | 2,08              |
| Donor 3 | IAV       | 48 h | 22,6            | 8,16             | 58,2            | 0,92            | 7,61            | 9,03            | 10,3              |
| Donor 4 | PBMC      | 48 h | 28,2            | 8,25             | 55              | 0,802           | 5,51            | 13,6            | 2,69              |
| Donor 4 | Mock      | 48 h | 30,1            | 8,85             | 52,1            | 0,722           | 5,71            | 14,6            | 3,44              |
| Donor 4 | IAV       | 48 h | 30,6            | 7,8              | 52,2            | 0,822           | 5,5             | 15,1            | 12,7              |

**Supplementary Table 1**
